# Supplementary material for: Determinants of Care Seeking for Mental Health Problems in Rural Haiti: Culture, Cost, or Competency
Source: Atypon-hosted journal article supplement (doi:10.1176/appi.ps.201200272), 2013-01-15
Supplement: 366_ds001.pdf [file 366_ds001.pdf]

**Supplementary Table . Detailed list of variables considered for inclusion into each multivariable model.**

| <b>Variable</b>   | <b>Question</b>                                                   | <b>Question format</b>                    | <b>Answer Choices</b>                                                                                                       |
|-------------------|-------------------------------------------------------------------|-------------------------------------------|-----------------------------------------------------------------------------------------------------------------------------|
| Age               | What age are you?                                                 | Write-in                                  | N/A                                                                                                                         |
| Gender            | Are you a woman or a man?                                         | Circle one                                | Female, male                                                                                                                |
| Marital status    | What is your marital status?                                      | Multiple choice                           | Single, cohabiting, divorced, widowed, married                                                                              |
| Education         | How much education do you have?                                   | Multiple choice                           | No formal schooling, some primary, finished primary, some high school, finished high school, finished graduate/professional |
| Religion          | What is your religion?                                            | Multiple choice (choose as many as apply) | Catholic, Protestant, Baptist, Episcopal, Vodou, no religion, other (write-in)                                              |
| Distance to work  | How much time does it take to arrive at your work?                | Multiple choice                           | Do not work, 0-15 minutes, 15-30 minutes, 30-60 minutes, 1-2 hours, more than 2 hours                                       |
| Type of work      | What work do you do?                                              | Multiple choice (choose as many as apply) | Do not work, commerce, teacher or professor, taxi driver, seamstress, farmer, raise animals, other (write-in)               |
| Distance to water | How much time does it take to get water and return to your house? | Multiple choice                           | 0-15 minutes, 15-30 minutes, 30-60 minutes, 1-2 hours, more than 2 hours                                                    |

|                                   |                                                                                                    |                                           |                                                                                                                                                                                                                                                                                                                                    |
|-----------------------------------|----------------------------------------------------------------------------------------------------|-------------------------------------------|------------------------------------------------------------------------------------------------------------------------------------------------------------------------------------------------------------------------------------------------------------------------------------------------------------------------------------|
| Type of water                     | Where do you get your water for drinking?                                                          | Multiple choice                           | River, well, spring, covered well, pipe/tap, other (write-in)                                                                                                                                                                                                                                                                      |
| Household size                    | How many people total (adults and children) live in this household (Kreyol: <i>Lakou</i> )         | Write-in                                  | N/A                                                                                                                                                                                                                                                                                                                                |
| SES scale                         | Do you have?                                                                                       | Multiple choice (choose as many as apply) | Tin roof, bicycle, motorcycle, television, radio, cement house, latrine, electricity, telephone                                                                                                                                                                                                                                    |
| Plots of land owned               | How many plots of land do you own?                                                                 | Write-in                                  | N/A                                                                                                                                                                                                                                                                                                                                |
| Trauma related to earthquake      | Which of the following did you experience regarding the earthquake?                                | Multiple choice (choose as many as apply) | I was in a town hit by the earthquake, I was injured/hurt, a family member of mine was killed, new people moved into my house                                                                                                                                                                                                      |
| General trauma                    | Which of the following have you <i>ever</i> experienced?                                           | Multiple choice (choose as many as apply) | Been attacked with a weapon (gun, knife, machete), had possessions stolen, been in a machine (car, motorcycle) accident, experienced large-scale violence (war, violent protest), been affected by a large fire, had a large flood in house or farm, had someone die in my family, had a life-threatening illness, have been raped |
| Reported household mental illness | Does anyone in your household suffer from sadness, sad heart, or stress that makes life difficult? | Binary                                    | Yes/ no                                                                                                                                                                                                                                                                                                                            |
| Opinions on causes of mental      | What is capable of causing sadness, sad heart, or stress that makes life difficult?                | Multiple choice (choose as                | Spirits, alcohol/drugs, thinking too much, problems with                                                                                                                                                                                                                                                                           |

|                                                 |                                                                                                     |                                           |                                                                                                                                               |
|-------------------------------------------------|-----------------------------------------------------------------------------------------------------|-------------------------------------------|-----------------------------------------------------------------------------------------------------------------------------------------------|
| illness                                         |                                                                                                     | many as apply)                            | friends, family or community, disasters, bad luck, lack of activities, other (write-in)                                                       |
| Number of children                              | How many children live in this household (Kreyol: <i>Lakou</i> )                                    | Write-in                                  | N/A                                                                                                                                           |
| Months of food insecurity                       | How many months of the year do you not have enough food                                             | Multiple choice                           | Always enough food<br>1 to 3 months<br>3 to 6 months<br>6 to 9 months<br>9 to 12 months                                                       |
| Stigma towards mental illness                   | If someone suffers from sadness, sad heart, or stress that makes life difficult, is it their fault? | Multiple choice                           | Never, sometimes, always                                                                                                                      |
| Alcohol use                                     | Do you drink alcohol?                                                                               | Binary                                    | Yes/no                                                                                                                                        |
| Care and household help                         | Do you have someone who can...                                                                      | Binary (yes/no)                           | Care for you if sick, go to the market or buy food for you, loan you money if you need it (not from bank), make food for you, give you advice |
| Monthly income                                  | How much <i>Goud</i> do you make per month?                                                         | Write-in                                  | N/A                                                                                                                                           |
| Living in Dominican Republic or Port-Au-Prince  | Have you ever lived in...                                                                           | Multiple choice (choose as many as apply) | Dominican Republic, Port-Au-Prince, other (write-in)                                                                                          |
| Working in Dominican Republic or Port-Au-Prince | Have you ever worked in...                                                                          | Multiple choice (choose as many as apply) | Dominican Republic, Port-Au-Prince, other (write-in)                                                                                          |
| BDI score                                       | Contact author for full list of locally-adapted Beck Depression Inventory                           | Multiple choice                           | Questions 1-21                                                                                                                                |

questions in Kreyol

---

Endorsed suicidal ideation  
(BDI item # 9)

In the past 2 weeks - thoughts of killing  
myself

Multiple choice

I have never thought of killing  
myself

I have thought of killing myself  
but I will not do it

I would like to kill myself

I will kill myself if I get the  
chance

---
